# Supplementary material for: Rejection Mechanism of Ionic Solute Removal by Nanofiltration Membranes: An Overview
Source: MDPI journal article supplement (doi:10.3390/nano12030437), 2022-01-27
Supplement: s1 [file s1]

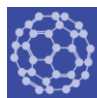

# Rejection Mechanism of Ionic Solute Removal by Nanofiltration Membranes: An Overview

Nur Syahirah Suhalim <sup>1</sup>, Norherdawati Kasim <sup>2,\*</sup>, Ebrahim Mahmoudi <sup>3</sup>, Intan Juliana Shamsudin <sup>2</sup>, Abdul Wahab Mohammad <sup>4</sup>, Fathiah Mohamed Zuki <sup>5</sup> and Nor Laili-Azua Jamari <sup>2</sup>

<sup>1</sup> Faculty of Defence Science and Technology, National Defence University of Malaysia, Kem Sungai Besi, Kuala Lumpur 57000, W.P. Kuala Lumpur, Malaysia; syahirahsuhlim@yahoo.com

<sup>2</sup> Department of Chemistry & Biology, Centre for Defence Foundation Studies, National Defence University of Malaysia, Kem Sungai Besi, Kuala Lumpur 57000, W.P. Kuala Lumpur, Malaysia; intanjuliana@upnm.edu.my (I.J.S.); azua@upnm.edu.my (N.L.-A.J.)

<sup>3</sup> Department of Chemical and Process Engineering, Faculty of Engineering and Built Environment, Universiti Kebangsaan Malaysia, Bangi 43600, Selangor, Malaysia; mahmoudi.ebi@ukm.edu.my

<sup>4</sup> Centre for Sustainable Process Technology (CESPRO), Faculty of Engineering and Built Environment, Universiti Kebangsaan Malaysia, Bangi 43600, Selangor, Malaysia; drawm@ukm.edu.my

<sup>5</sup> Department of Chemical Engineering, Faculty of Engineering, University of Malaya, Kuala Lumpur 50603, W.P. Kuala Lumpur, Malaysia; fathiahmz@um.edu.my

\* Correspondence: [herdawati@upnm.edu.my](mailto:herdawati@upnm.edu.my)

- (1) Input the numerical parameters: number of discretization points,  $N$ , grid expansion factor, maximum number of iterations, normalized residuals target and the under-relaxation factor. If the grid expansion factor is higher than one, the distance between consecutive grid nodes expands by this factor from the membrane/solution interfaces to the center of the membrane active layer. If the mesh expansion factor is equal to one, the grid is uniform.
- (2) Input the membrane pore radius,  $r_p$ , equivalent membrane thickness,  $\Delta x_e$ , membrane volume charge density,  $cx$  and pore dielectric constant,  $\epsilon_p$ .
- (3) Input the operating parameters: permeate flux,  $J_v$ , temperature,  $T$ , number of ionic species,  $N_c$ , ions diffusivities,  $D_{i,\infty}$ , concentration of the ions in the feed-solution,  $c_{i,b}$ , parameters of the mass-transfer correlation, feed Reynolds number, and characteristic length of feed-channel,  $L$ .
- (4) Initialize the variables  $c_{i,m}$ ,  $c_{i,j}$ ,  $c_{i,p}$ ,  $\Psi_j$ ,  $\Psi_p$  and  $\epsilon$ . The concentrations,  $c_{i,m}$ ,  $c_{i,j}$  and  $c_{i,p}$ , are initialized with the bulk concentration,  $c_{i,b}$ , and the initial values for  $\Psi_j$ ,  $\Psi_p$  and  $\epsilon$  are taken as zero.
- (5) Compute the coefficients of the coupled linearized system of equations.
- (6) Solve the previous linear system of equations using LU decomposition with partial pivoting. These calculations are accomplished using the subroutine SGEVS contained in the LAPACK package, which is a collection of Fortran subroutines for solving dense linear algebra problems.
- (7) Under-relax the computed solutions.
- (8) Update the coefficients of the coupled linearized system of equations using the under-relaxed variables.
- (9) Compute the normalized residuals.
- (10) Repeat the steps 5–9 until the normalized residuals are below a given target.
